# Supplementary material for: A new porphyrinic vanadium-based MOF constructed from infinite V(OH)O4 chains: syntheses, characterization and photoabsorption properties
Source: Royal Society of Chemistry journal article supplement (doi:10.1039/d1nj05333g), 2021-11-30
Supplement: d1nj05333g1.pdf [file d1nj05333g1.pdf]

## Supporting information

### **A new porphyrinic vanadium-based MOF constructed from infinite V(OH)O<sub>4</sub> chains: syntheses, characterization and photoabsorption property**

My V. Nguyen,<sup>\*,a</sup> Hieu C. Dong,<sup>b,c</sup> Vy T. N. Truong,<sup>d</sup> Hung N. Nguyen,<sup>a</sup> Loc C. Luu,<sup>e</sup> Nam N. Dang<sup>b,c</sup> and Tuyet A. T. Nguyen<sup>a</sup>

<sup>a</sup> Faculty of Chemistry, Ho Chi Minh City University of Education, Ho Chi Minh City, 700000, Vietnam.

<sup>b</sup> Future Materials and Devices Laboratory, Institute of Fundamental and Applied Sciences, Duy Tan University, Ho Chi Minh City, 700000, Vietnam.

<sup>c</sup> Faculty of Natural Sciences, Duy Tan University, Da Nang, 550000, Vietnam.

<sup>d</sup> Royal Melbourne Institute of Technology (RMIT) University, Ho Chi Minh City, 700000, Vietnam.

<sup>e</sup> HCMC University of Technology, VNU-HCM, 268 Ly Thuong Kiet, District 10, Ho Chi Minh City, Vietnam.

\*To whom correspondence should be addressed: [mynv@hcmue.edu.vn](mailto:mynv@hcmue.edu.vn)

---

## Table of Contents

---

|                    |                                                                                                      |                |
|--------------------|------------------------------------------------------------------------------------------------------|----------------|
| <b>Section S1</b>  | <i>Optimal conditions for synthesis of V-MOF-10</i>                                                  | <b>S3</b>      |
| <b>Section S2</b>  | <i>Reaction scheme and microscope image of V-MOF-10</i>                                              | <b>S4</b>      |
| <b>Section S3</b>  | <i>Fourier Transform Infrared Spectroscopy (FT-IR)</i>                                               | <b>S5</b>      |
| <b>Section S4</b>  | <i>Nuclear Magnetic Resonance (NMR) Spectroscopy</i>                                                 | <b>S6</b>      |
| <b>Section S5</b>  | <i>Powder X-ray Diffraction (PXRD) Analysis</i>                                                      | <b>S7-S17</b>  |
| <b>Section S6</b>  | <i>Thermogravimetric Analysis (TGA)</i>                                                              | <b>S18</b>     |
| <b>Section S7</b>  | <i>N<sub>2</sub> adsorption measurement and surface area prediction</i>                              | <b>S19-S21</b> |
| <b>Section S8</b>  | <i>Scanning Electron Microscopy (SEM) and Energy-Dispersive X-ray Mapping (EDX-mapping) analysis</i> | <b>S22-S23</b> |
| <b>Section S9</b>  | <i>Transmission Electron Microscopy (TEM) analysis</i>                                               | <b>S24</b>     |
| <b>Section S10</b> | <i>Ultraviolet Visible Spectroscopy (UV-Vis) analysis</i>                                            | <b>S25</b>     |
| <b>Section S11</b> | <i>Photocatalytic investigations for the degradation of MB and MO</i>                                | <b>S26-S27</b> |
| <b>Section S12</b> | <i>Stability of V-MOF-10 after Photocatalytic recycles</i>                                           | <b>S28</b>     |

---

**Section S1.** Optimal conditions for synthesis of V-MOF-10

| No. | Parameter                              | Result                                                                                                                                                                  | Comment                                                                                                       |
|-----|----------------------------------------|-------------------------------------------------------------------------------------------------------------------------------------------------------------------------|---------------------------------------------------------------------------------------------------------------|
| 1   | Molar ratio of $VCl_3 : H_2O$          | The ratio of 2.2:1 supports the formation of V-MOF-10 structure.                                                                                                        | High crystallinity quality.                                                                                   |
| 2   | Addition of DMF as a solvent           | Generation of crystalline X-ray products.                                                                                                                               |                                                                                                               |
| 3   | Addition of acetic acid as a modulator | Increase of the crystallinity of V-MOF-10.                                                                                                                              | High crystallinity quality and reproducibility level more than 80% with introduced acetic acid (150 $\mu$ L). |
| 4   | Temperature                            | At $T \geq 165$ °C, V-MOF-10 is significantly lost the structural order.<br>At $T \leq 100$ °C, V-MOF-10 structure is not created or found the amorphous X-ray product. | The stable and the best reaction temperature at 150 °C.                                                       |
| 5   | Time                                   | 2 hours for heating, t hour for reaction, and 4 hours for cooling to room temperature.<br>$t < 20$ h no formed V-MOF-10.<br>$t \geq 24$ h formed V-MOF-10.              | The best time for reaction (t) is 24 h.                                                                       |

**Section S2.** Reaction scheme and microscope image of V-MOF-10

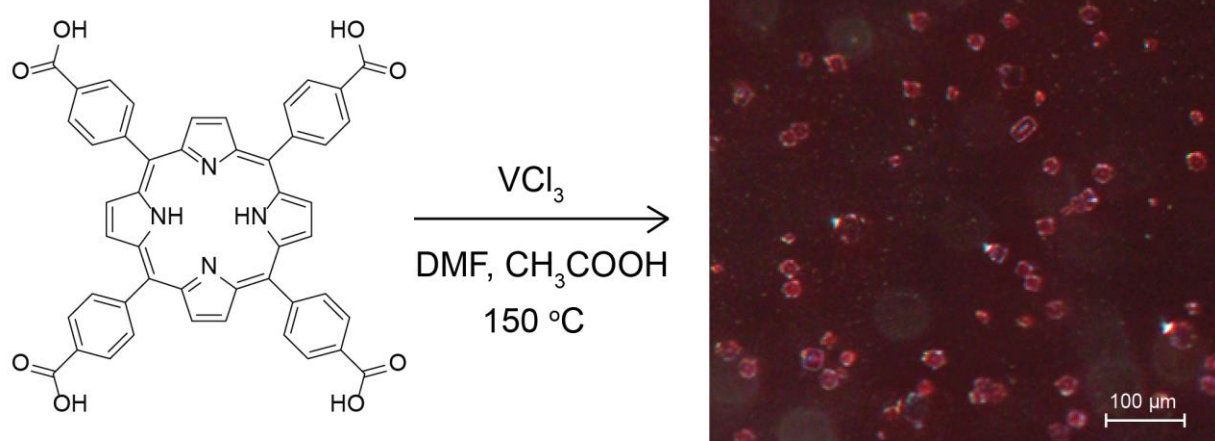

**Figure S1.** Reaction scheme and microscope image of V-MOF-10 polycrystals.

Section S3. Fourier Transform Infrared Spectroscopy (FT-IR)

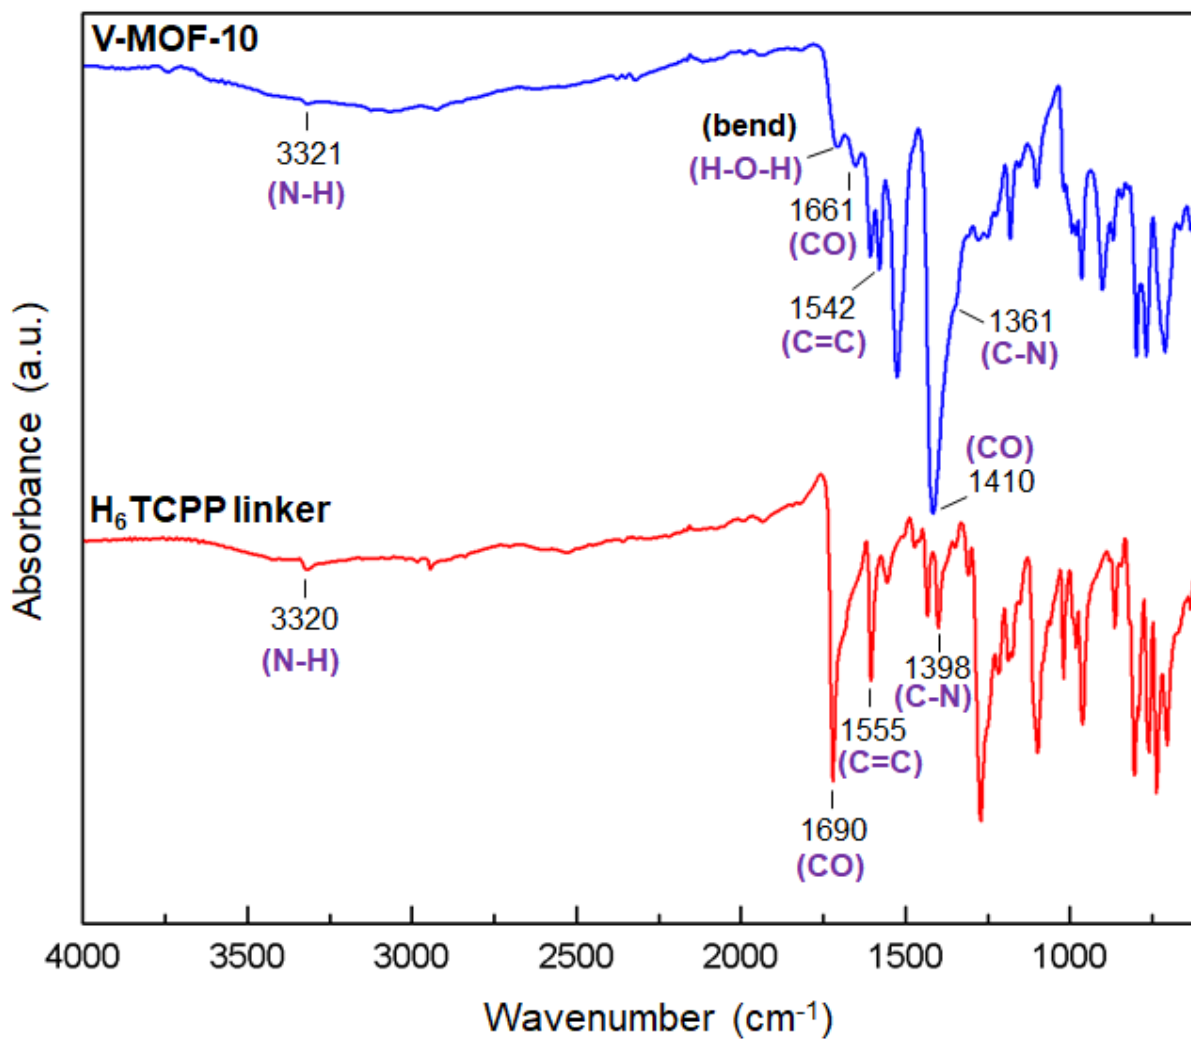

**Figure S2.** FT-IR spectrum of activated V-MOF-10 (blue) in comparison with porphyrinic linker (red)

## Section S4. Nuclear Magnetic Resonance (NMR) Spectroscopy

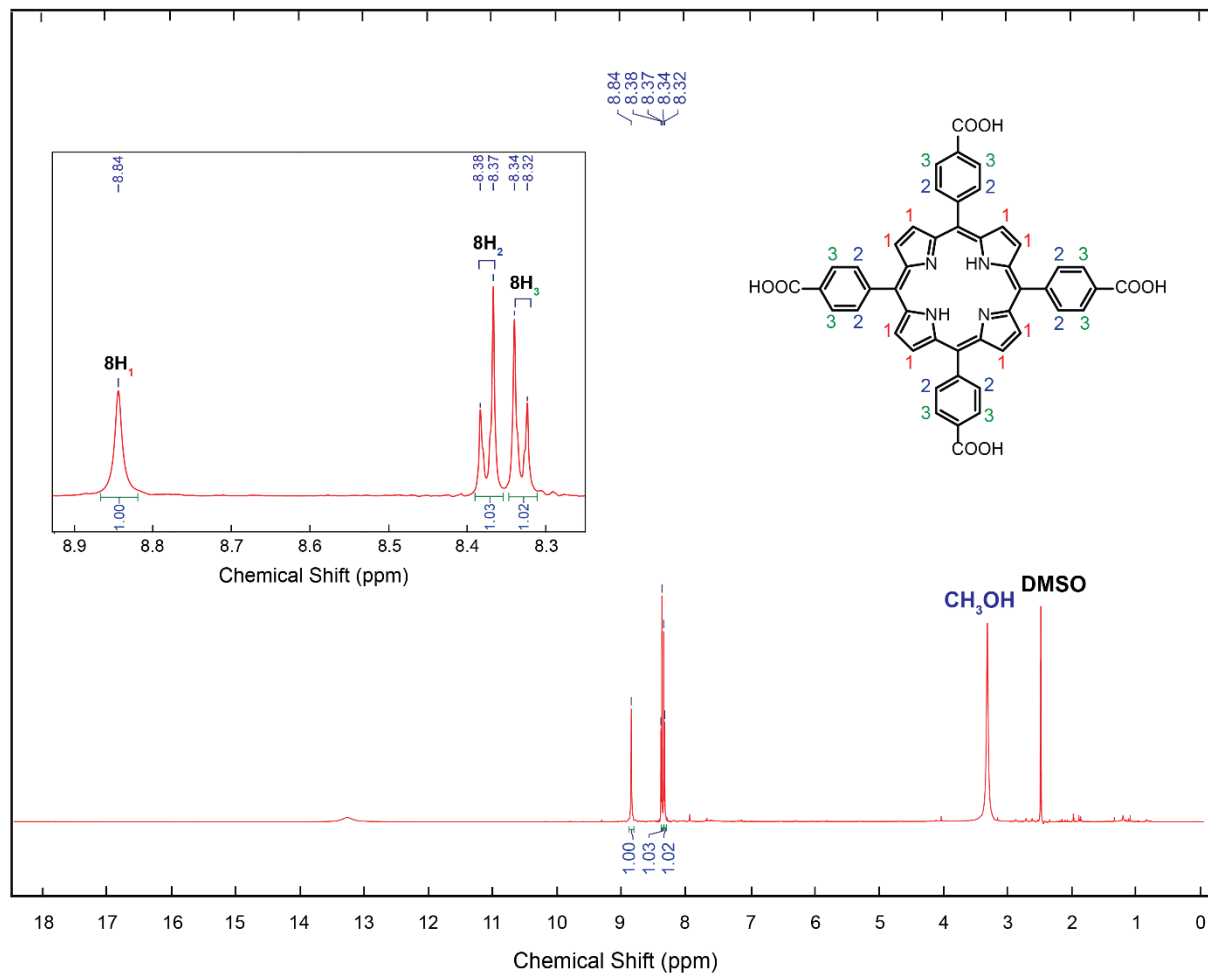

**Figure S3.**  $^1\text{H-NMR}$  spectrum of porphyrinic linker ( $\text{H}_6\text{TCPP}$ ) in  $\text{DMSO}$  solvent

## Section S5. Powder X-ray Diffraction (PXRD) Analysis

### PXRD data collection

PXRD measurements were performed on a Bruker D8 Advance diffractometer in reflectance Bragg-Brentano geometry using Ni filtered Cu K $\alpha$  focused radiation (1.54059 Å) at 1600 W (40 kV, 40 mA) power, which was equipped with a LynxEye detector. The best counting statistics were obtained by collecting samples using a step scan of 0.02° with 2 $\theta$  from 3 – 50° and exposure time of 10 s per step. The analysis was conducted at room temperature and atmospheric pressure.

### Unit cell determination and structural modeling of V-MOF-10

Unit cell determinations were conducted using *Materials Studio 7.0* software. An initial orthorhombic lattice parameter ( $a = 31.978$  Å,  $b = 6.5812$  Å,  $c = 16.862$  Å) of Al-PMOF material with space group *Cmmm* was chosen for V-MOF-10, in which the Al atoms was substituted by V atoms. Whole pattern profile fitting and extraction of the integrated intensities was performed with data from 2 $\theta = 3 – 50$ °. A background correction was performed using a 20-parameter Chebyshev polynomial function. Subsequently, the substituted structural model with V atoms was optimized for the generation of an energetic minimization using the universal force field implemented in the *Forcite* module. The unit cell of modeled structure was optimized until the energy convergence reached the value of 0.0001 kcal mol<sup>-1</sup>.

A full Pawley pattern fitting using synchrotron radiation data from 2 $\theta = 3 – 50$ ° was carried out against the as-synthesized powder pattern of V-MOF-10. The calculated PXRD pattern for modeled structure obtained a good accordance with the experimental PXRD pattern as evidenced by the fitting that converged with reasonable residual values ( $R_{wp} = 6.91\%$ ,  $R_p = 5.16\%$ ) to achieve the unit cell parameters ( $a = 32.9374(3)$  Å,  $b = 6.8549(9)$  Å,  $c = 16.6379(9)$  Å).

To optimize the atom position in the lattice of V-MOF-10, a full range Rietveld refinement has been performed for fitting between the modeled structure and experimental powder pattern with 2 $\theta = 3 – 50$ °. This resulted a satisfactory agreement with the experimental PXRD pattern at reasonable residual values ( $R_{wp} = 6.48\%$ ,  $R_p = 4.96\%$ ) and the final unit cell parameters ( $a = 32.9288(4)$  Å,  $b = 6.8495(7)$  Å,  $c = 16.5912(1)$  Å). The fractional atomic coordinates and refined cell parameters for V-MOF-10 after the Rietveld fitting could be identify in Table S1 and crystal structure information was indicated in Table S2.

**Table S1.** Atomic coordinates and refined unit cell parameters of V-MOF-10 after Rietveld refinement

|                                         |                      |          |          |                |
|-----------------------------------------|----------------------|----------|----------|----------------|
| <b>Name</b>                             | V-MOF-10             |          |          |                |
| <b>Space Group</b>                      | <i>Cmmm</i> (No. 65) |          |          |                |
| <i>a</i> (Å)                            | 32.9288(4)           |          |          |                |
| <i>b</i> (Å)                            | 6.8495(7)            |          |          |                |
| <i>c</i> (Å)                            | 16.5912(1)           |          |          |                |
| <b>Unit Cell Volume (Å<sup>3</sup>)</b> | 3742.12(1)           |          |          |                |
| <i>R<sub>wp</sub></i>                   | 6.48%                |          |          |                |
| <i>R<sub>p</sub></i>                    | 4.96%                |          |          |                |
| <b>Atom Name</b>                        | <i>x</i>             | <i>y</i> | <i>z</i> | Site occupancy |
| O1                                      | 0.78861              | 0.13200  | 0.92541  | 0.00000        |
| C1                                      | 0.89160              | 0.16373  | 0.77171  | 0.00000        |
| C2                                      | 0.86084              | 0.15371  | 0.82929  | 0.02000        |
| V1                                      | 0.25839              | 0.16874  | -0.00009 | 0.01000        |
| O2                                      | 0.27738              | -0.04817 | -0.00010 | 0.00000        |
| C3                                      | 0.80355              | -0.02503 | 0.89583  | 0.01000        |
| C4                                      | 0.96983              | 0.03073  | 0.67878  | 0.16000        |
| C5                                      | 0.98332              | 0.02975  | 0.76149  | 0.00000        |
| C6                                      | 0.91761              | 0.02110  | 0.56850  | 0.01000        |
| C7                                      | 0.87558              | 0.01834  | 0.54324  | 0.00000        |
| C8                                      | 0.92965              | 0.02411  | 0.65113  | 0.00000        |
| C9                                      | 0.89742              | 0.01367  | 0.71451  | 0.00000        |
| C10                                     | 0.83559              | -0.01017 | 0.83290  | 0.06000        |
| N1                                      | 0.94267              | 0.02268  | 0.50214  | 0.03000        |
| N2                                      | -0.00015             | 0.03225  | 0.63125  | 0.00000        |
| O3                                      | 0.20886              | 0.77254  | 0.92355  | 0.09000        |
| O4                                      | 0.79576              | 0.78449  | 0.07817  | 0.06000        |
| O5                                      | 0.21781              | 0.12490  | 0.08498  | 0.11000        |
| O6                                      | 0.20903              | 0.77346  | 0.08229  | 0.03000        |
| O7                                      | 0.78562              | 0.13428  | 0.08731  | 0.09000        |
| O8                                      | 0.21754              | 0.12406  | 0.92099  | 0.11000        |
| O9                                      | 0.79242              | 0.77882  | 0.91790  | 0.00000        |
| O10                                     | 0.28419              | 0.61186  | 0.92095  | 0.00000        |
| O11                                     | 0.71180              | 0.29059  | 0.92228  | 0.04000        |
| O12                                     | 0.29311              | 0.28596  | 0.08185  | 0.01000        |
| O13                                     | 0.72056              | 0.62205  | 0.08637  | 0.05000        |
| O14                                     | 0.71091              | 0.29689  | 0.08137  | 0.00000        |
| O15                                     | 0.28420              | 0.61176  | 0.08470  | 0.25000        |
| O16                                     | 0.71799              | 0.61781  | 0.92273  | 0.06000        |
| O17                                     | 0.29284              | 0.28589  | 0.92315  | 0.00000        |
| C11                                     | 0.10815              | 0.82534  | 0.76916  | 0.00000        |
| C12                                     | 0.89579              | 0.82903  | 0.23497  | 0.00000        |
| C13                                     | 0.13611              | 0.15630  | 0.28349  | 0.00000        |
| C14                                     | 0.10823              | 0.82657  | 0.23609  | 0.00000        |
| C15                                     | 0.86898              | 0.16167  | 0.28151  | 0.05000        |
| C16                                     | 0.13578              | 0.15650  | 0.72285  | 0.00000        |
| C17                                     | 0.87162              | 0.82546  | 0.71829  | 0.00000        |
| C18                                     | 0.36572              | 0.64411  | 0.72216  | 0.00000        |
| C19                                     | 0.60988              | 0.34086  | 0.76964  | 0.00000        |



|     |         |          |          |         |
|-----|---------|----------|----------|---------|
| C20 | 0.39418 | 0.34141  | 0.23535  | 0.04000 |
| C21 | 0.63817 | 0.65155  | 0.28381  | 0.05000 |
| C22 | 0.61030 | 0.34815  | 0.23559  | 0.00000 |
| C23 | 0.36611 | 0.64548  | 0.28235  | 0.00000 |
| C24 | 0.63752 | 0.64578  | 0.72258  | 0.00000 |
| C25 | 0.39367 | 0.33989  | 0.76922  | 0.00000 |
| C26 | 0.13866 | 0.81038  | 0.82695  | 0.00000 |
| C27 | 0.86524 | 0.81609  | 0.17719  | 0.00000 |
| C28 | 0.16611 | 0.14517  | 0.22436  | 0.11000 |
| C29 | 0.13882 | 0.81175  | 0.17851  | 0.00000 |
| C30 | 0.83889 | 0.15174  | 0.22260  | 0.02000 |
| C31 | 0.16578 | 0.14483  | 0.78198  | 0.00000 |
| C32 | 0.84151 | 0.81225  | 0.77695  | 0.00000 |
| C33 | 0.33581 | 0.63282  | 0.78147  | 0.02000 |
| C34 | 0.64045 | 0.32630  | 0.82734  | 0.00000 |
| C35 | 0.36358 | 0.32566  | 0.17778  | 0.01000 |
| C36 | 0.66822 | 0.64111  | 0.22476  | 0.00000 |
| C37 | 0.64093 | 0.33400  | 0.17807  | 0.47000 |
| C38 | 0.33611 | 0.63346  | 0.22325  | 0.00000 |
| C39 | 0.66745 | 0.63509  | 0.78187  | 0.00000 |
| C40 | 0.36316 | 0.32487  | 0.82700  | 0.00000 |
| V2  | 0.75990 | 0.66503  | -0.00137 | 0.04000 |
| V3  | 0.24346 | 0.65585  | 0.00011  | 0.01000 |
| V4  | 0.74609 | 0.17787  | 0.00091  | 0.04000 |
| O18 | 0.72681 | -0.03852 | -0.00083 | 0.02000 |
| O19 | 0.77937 | 0.44891  | -0.00147 | 0.00000 |
| O20 | 0.22443 | 0.43899  | 0.00009  | 0.05000 |
| C41 | 0.20002 | -0.03210 | 0.89674  | 0.00000 |
| C42 | 0.80400 | -0.02255 | 0.10818  | 0.00000 |
| C43 | 0.20029 | -0.03117 | 0.10924  | 0.00000 |
| C44 | 0.30168 | 0.45587  | 0.89648  | 0.00000 |
| C45 | 0.70172 | 0.45990  | 0.89693  | 0.89693 |
| C46 | 0.30187 | 0.45584  | 0.10872  | 0.00000 |
| C47 | 0.70255 | 0.46618  | 0.10943  | 0.00000 |
| C48 | 0.03400 | 0.02972  | 0.67898  | 0.00000 |
| C49 | 0.97015 | 0.02419  | 0.32616  | 0.00000 |
| C50 | 0.03424 | 0.02620  | 0.32662  | 0.05000 |
| C51 | 0.46752 | 0.51859  | 0.67852  | 0.03000 |
| C52 | 0.53583 | 0.51882  | 0.67877  | 0.02000 |
| C53 | 0.46793 | 0.52209  | 0.32637  | 0.00000 |
| C54 | 0.53625 | 0.52417  | 0.32652  | 0.08000 |
| C55 | 0.02042 | 0.03170  | 0.76160  | 0.00000 |
| C56 | 0.98373 | 0.04159  | 0.24387  | 0.00000 |
| C57 | 0.02085 | 0.04311  | 0.24418  | 0.02000 |
| C58 | 0.48094 | 0.53637  | 0.76091  | 0.00000 |
| C59 | 0.52227 | 0.53640  | 0.76108  | 0.00000 |
| C60 | 0.48144 | 0.54202  | 0.24411  | 0.00000 |
| C61 | 0.52278 | 0.54342  | 0.24420  | 0.00000 |
| C62 | 0.08642 | 0.01730  | 0.56926  | 0.00000 |
| C63 | 0.91763 | 0.01940  | 0.43569  | 0.03000 |
| C64 | 0.08650 | 0.01622  | 0.43659  | 0.00000 |

|     |          |          |         |         |
|-----|----------|----------|---------|---------|
| C65 | 0.41534  | 0.50166  | 0.56858 | 0.09000 |
| C66 | 0.58824  | 0.50337  | 0.56917 | 0.01000 |
| C67 | 0.41552  | 0.50242  | 0.43587 | 0.08000 |
| C68 | 0.58844  | 0.50590  | 0.43646 | 0.00000 |
| C69 | 0.12807  | -0.01157 | 0.54429 | 0.00000 |
| C70 | 0.87562  | 0.01417  | 0.46081 | 0.00000 |
| C71 | 0.12813  | -0.01202 | 0.46180 | 0.00000 |
| C72 | 0.37379  | 0.47156  | 0.54322 | 0.00000 |
| C73 | 0.62987  | 0.47401  | 0.54422 | 0.00000 |
| C74 | 0.37390  | 0.47195  | 0.46072 | 0.00000 |
| C75 | 0.63001  | 0.47570  | 0.46173 | 0.00000 |
| C76 | 0.07422  | 0.02177  | 0.65172 | 0.00000 |
| C77 | 0.92987  | 0.01993  | 0.35324 | 0.01000 |
| C78 | 0.07444  | 0.01990  | 0.35407 | 0.00000 |
| C79 | 0.42734  | 0.50841  | 0.65111 | 0.05000 |
| C80 | 0.57605  | 0.50920  | 0.65160 | 0.03000 |
| C81 | 0.42773  | 0.51045  | 0.35348 | 0.01000 |
| C82 | 0.57644  | 0.51432  | 0.35395 | 0.00000 |
| C83 | 0.10625  | 0.01032  | 0.71546 | 0.00000 |
| C84 | 0.89802  | 0.01324  | 0.28907 | 0.04000 |
| C85 | 0.10647  | 0.01048  | 0.29037 | 0.00000 |
| C86 | 0.39535  | 0.49832  | 0.71496 | 0.01000 |
| C87 | 0.60802  | 0.49945  | 0.71551 | 0.03000 |
| C88 | 0.39581  | 0.50008  | 0.28948 | 0.06000 |
| C89 | 0.60851  | 0.50574  | 0.29026 | 0.01000 |
| C90 | 0.16779  | -0.01657 | 0.83428 | 0.00000 |
| C91 | 0.83639  | -0.00953 | 0.17028 | 0.00000 |
| C92 | 0.16807  | -0.01563 | 0.17173 | 0.05000 |
| C93 | 0.33390  | 0.47180  | 0.83400 | 0.27000 |
| C94 | 0.66950  | 0.47410  | 0.83439 | 0.02000 |
| C95 | 0.33421  | 0.47210  | 0.17091 | 0.09000 |
| C96 | 0.67022  | 0.48102  | 0.17175 | 0.00000 |
| N3  | 0.06160  | 0.03173  | 0.50286 | 1.00000 |
| N4  | 0.44028  | 0.51751  | 0.50238 | 0.00000 |
| N5  | 0.56348  | 0.51971  | 0.50271 | 0.64000 |
| N6  | 0.00001  | 0.01724  | 0.37393 | 0.00000 |
| N7  | 0.50171  | 0.51150  | 0.63111 | 0.00000 |
| N8  | 0.50207  | 0.51488  | 0.37395 | 0.00000 |
| H1  | 0.34824  | 0.44927  | 0.58319 | 0.00000 |
| H2  | 0.34845  | 0.45021  | 0.42045 | 0.00000 |
| H3  | 0.50207  | 0.50821  | 0.43595 | 0.12000 |
| H4  | 0.46115  | 0.54909  | 0.81300 | 0.34000 |
| H5  | 0.54195  | 0.54927  | 0.81334 | 0.20000 |
| H6  | 0.50170  | 0.50647  | 0.56909 | 0.04000 |
| H7  | 0.65533  | 0.45132  | 0.58440 | 0.00000 |
| H8  | 0.65560  | 0.45470  | 0.42175 | 0.12000 |
| H9  | 0.46171  | 0.55527  | 0.19194 | 0.00000 |
| H10 | 0.54252  | 0.55804  | 0.19210 | 0.00000 |
| H11 | -0.00010 | 0.03261  | 0.56917 | 0.06000 |
| H12 | -0.00017 | 0.01104  | 0.43596 | 0.00000 |
| H13 | 0.84959  | 0.02004  | 0.58307 | 0.00000 |

|     |         |          |         |         |
|-----|---------|----------|---------|---------|
| H14 | 0.84968 | 0.00837  | 0.42089 | 0.00000 |
| H15 | 0.15358 | -0.03275 | 0.58447 | 0.00000 |
| H16 | 0.15367 | -0.03393 | 0.42177 | 0.21000 |
| H17 | 0.04004 | 0.03319  | 0.81419 | 0.00000 |
| H18 | 0.04066 | 0.05720  | 0.19219 | 0.03000 |
| H19 | 0.96365 | 0.02673  | 0.81398 | 0.62000 |
| H20 | 0.96406 | 0.05419  | 0.19158 | 0.00000 |
| H21 | 0.36192 | 0.19930  | 0.86750 | 0.46000 |
| H22 | 0.41625 | 0.22494  | 0.76487 | 0.00000 |
| H23 | 0.31349 | 0.74850  | 0.78710 | 0.00000 |
| H24 | 0.36632 | 0.76847  | 0.68089 | 0.00000 |
| H25 | 0.36237 | 0.19990  | 0.13737 | 0.00000 |
| H26 | 0.31371 | 0.74880  | 0.21765 | 0.06000 |
| H27 | 0.36666 | 0.76998  | 0.32355 | 0.00000 |
| H28 | 0.41684 | 0.22678  | 0.23966 | 0.00000 |
| H29 | 0.58741 | 0.22541  | 0.76528 | 0.51000 |
| H30 | 0.63683 | 0.77003  | 0.68127 | 0.00000 |
| H31 | 0.68967 | 0.75121  | 0.78746 | 0.00000 |
| H32 | 0.64186 | 0.20054  | 0.86772 | 0.03000 |
| H33 | 0.63749 | 0.77523  | 0.32546 | 0.00000 |
| H34 | 0.58770 | 0.23313  | 0.23944 | 0.00000 |
| H35 | 0.64225 | 0.20903  | 0.13725 | 0.00000 |
| H36 | 0.69059 | 0.75674  | 0.21971 | 0.00000 |
| H37 | 0.08567 | 0.71153  | 0.24030 | 0.00000 |
| H38 | 0.13550 | 0.28037  | 0.32492 | 0.25000 |
| H39 | 0.14011 | 0.68616  | 0.13804 | 0.51000 |
| H40 | 0.18844 | 0.26087  | 0.21904 | 0.00000 |
| H41 | 0.13997 | 0.68433  | 0.86717 | 0.00000 |
| H42 | 0.08572 | 0.70975  | 0.76449 | 0.04000 |
| H43 | 0.18808 | 0.26056  | 0.78762 | 0.06000 |
| H44 | 0.13509 | 0.28127  | 0.68179 | 0.00000 |
| H45 | 0.86361 | 0.69043  | 0.13681 | 0.00000 |
| H46 | 0.91794 | 0.71218  | 0.23948 | 0.33000 |
| H47 | 0.81688 | 0.26875  | 0.21705 | 0.00000 |
| H48 | 0.87008 | 0.28678  | 0.32232 | 0.00000 |
| H49 | 0.87551 | 0.70700  | 0.67482 | 0.00000 |
| H50 | 0.82215 | 0.68414  | 0.77933 | 0.78000 |
| H51 | 0.91112 | 0.29146  | 0.77030 | 0.00000 |
| H52 | 0.85635 | 0.27275  | 0.87223 | 0.31000 |

**Table S2.** Important crystallographic information for V-MOF-10

| <b>Parameters</b>                  | <b>V-MOF-10</b>            |
|------------------------------------|----------------------------|
| Empirical formula                  | $C_{48}H_{26}N_4O_{10}V_2$ |
| Symmetry                           | <i>Orthorhombic</i>        |
| Space group                        | <i>Cmmm</i>                |
| $a$ (Å)                            | 32.9288(4)                 |
| $b$ (Å)                            | 6.8495(7)                  |
| $c$ (Å)                            | 16.5912(1)                 |
| Unit Cell Volume (Å <sup>3</sup> ) | 3742.12(1)                 |
| Z                                  | 2                          |
| Wavelength (CuK $\alpha$ )         | 1.54059                    |
| Temperature (K)                    | 298                        |
| Angular range $2\theta$ (°)        | 3-50                       |

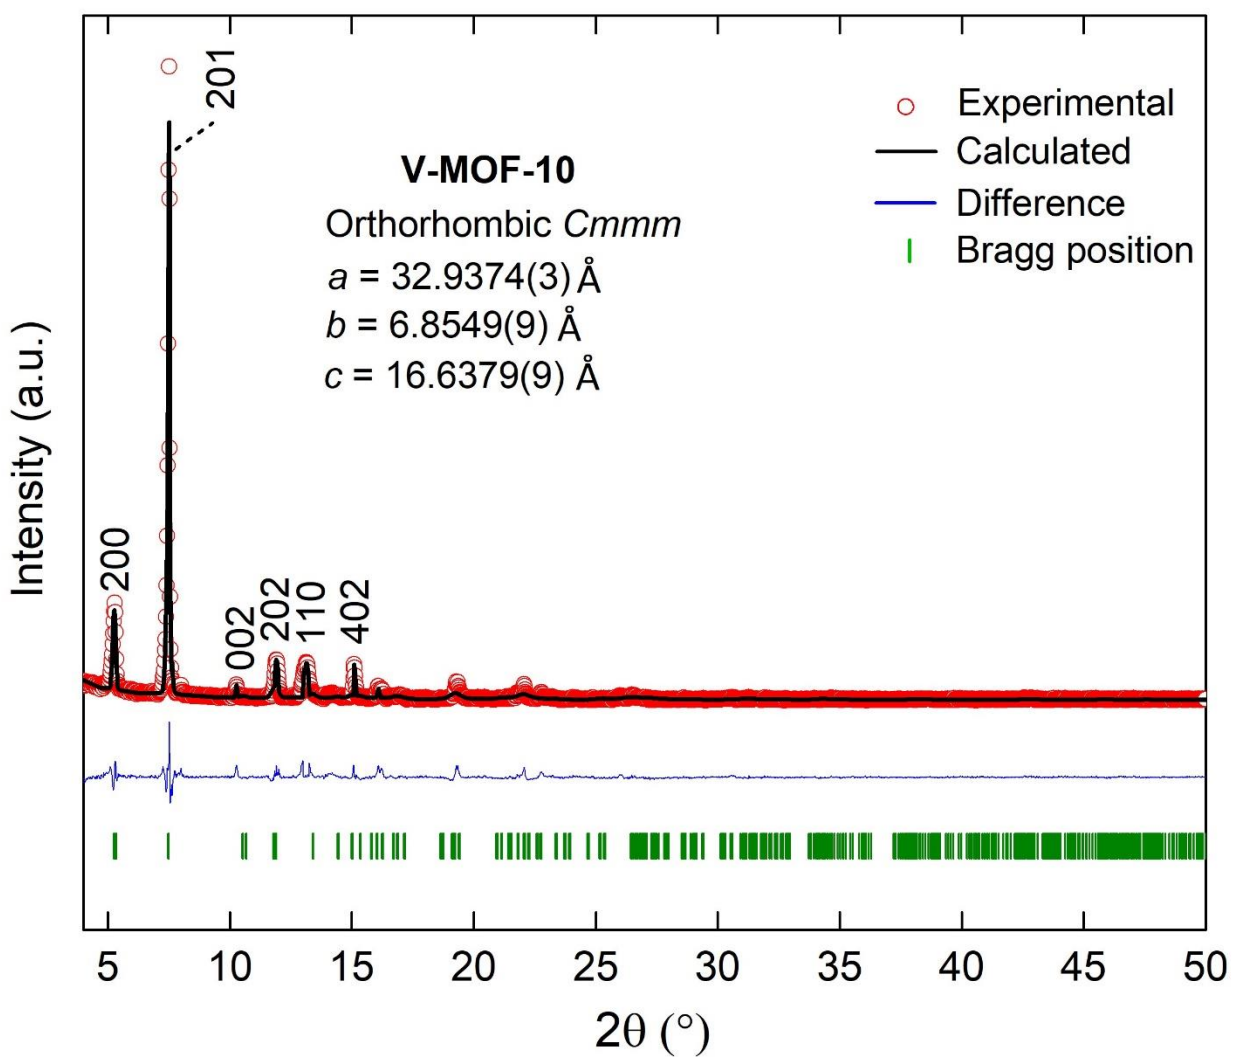

**Figure S4.** Result of the Pawley fit of as-synthesized V-MOF-10

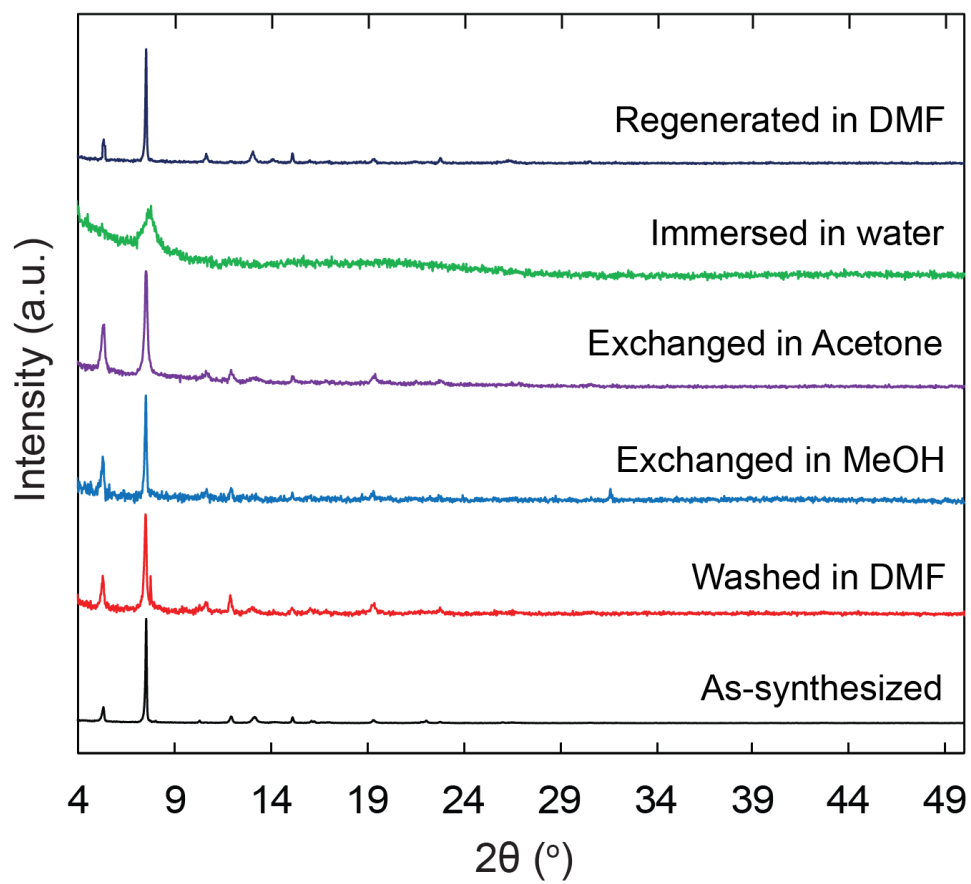

**Figure S5.** PXRD patterns show the chemical stability of V-MOF-10 in different solvents

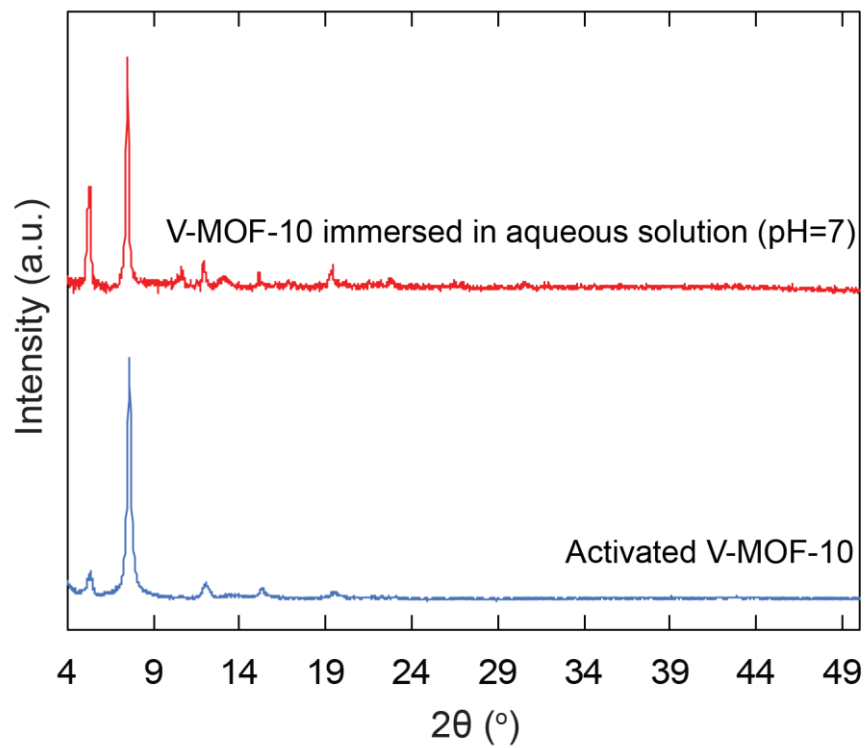

**Figure S6.** PXRD pattern shows the stability of V-MOF-10 in aqueous solution at pH = 7

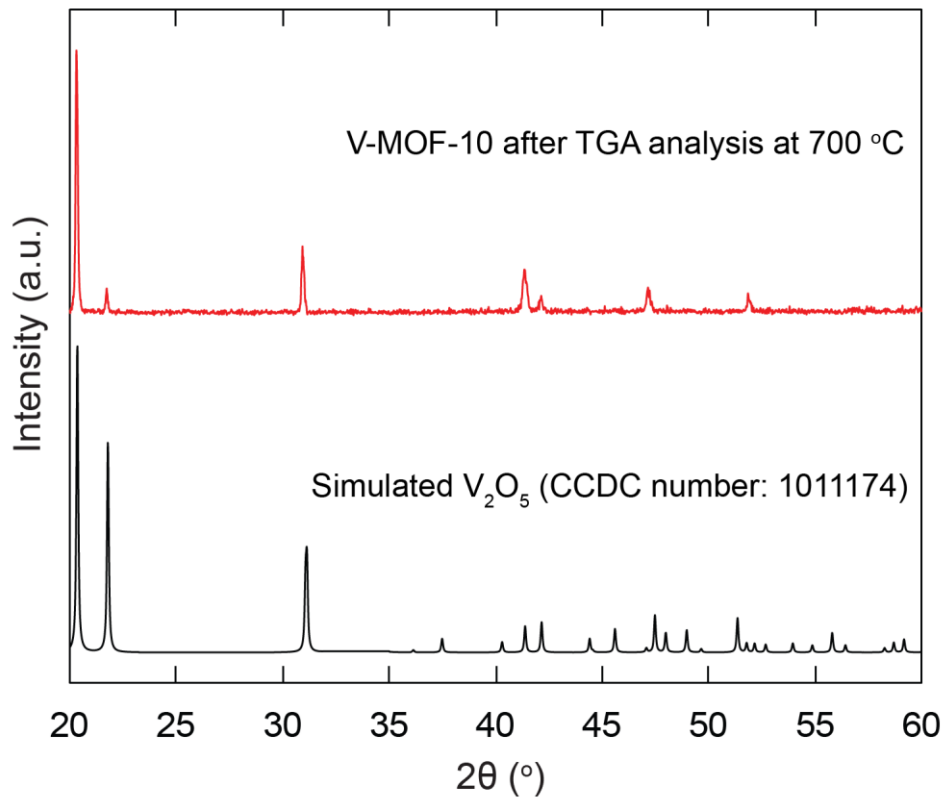

**Figure S7.** PXRD pattern of V-MOF-10 after annealing at 700 °C (red) in comparison with simulated  $V_2O_5$  (black)



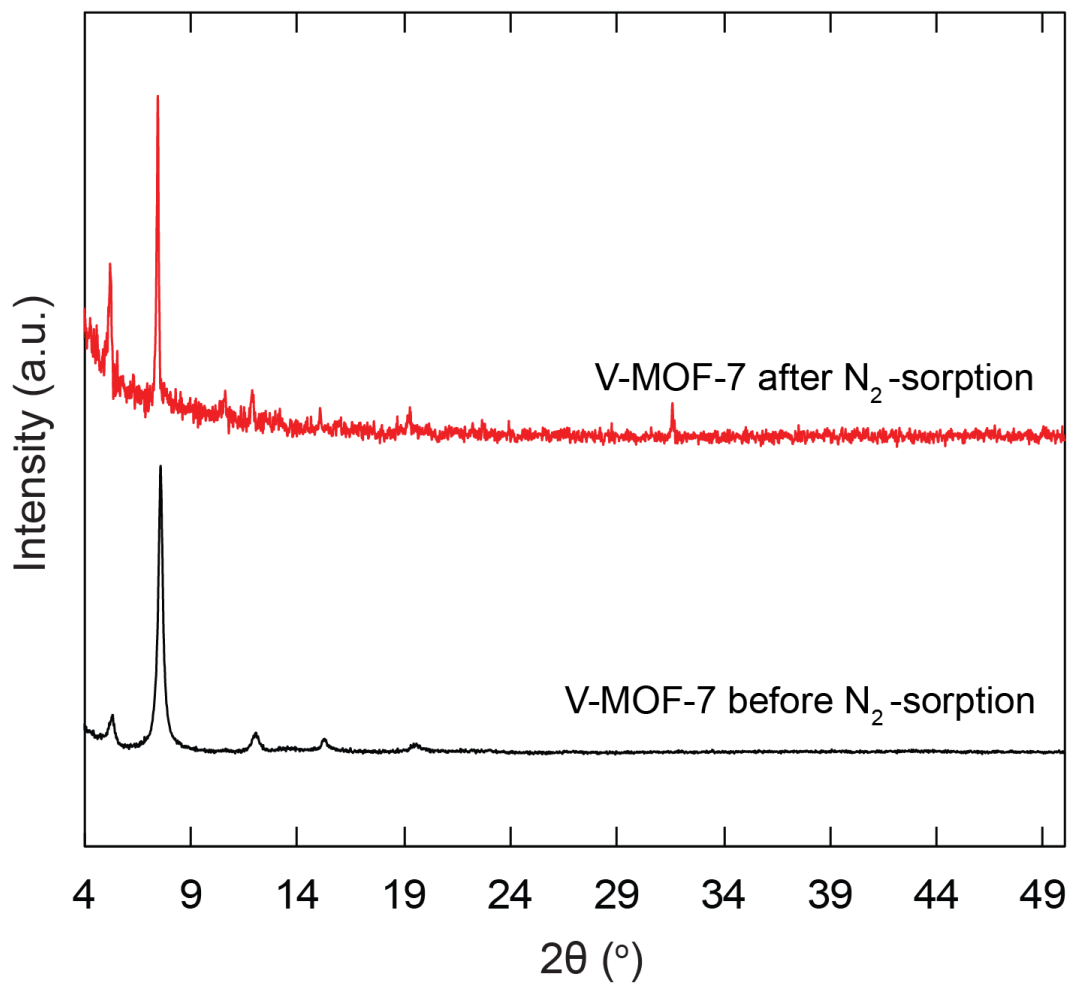

**Figure S8.** PXRD patterns of V-MOF-10 before and after the N<sub>2</sub> sorption experiments

**Section S6.** Thermogravimetric Analysis (TGA)

The thermal stability of V-MOF-10 was determined by thermogravimetric analysis (TGA). In this work, an activated V-MOF-10 (15 mg) was heated under airflow ( $50 \text{ mL min}^{-1}$ ) from 25 to 700 °C with a gradient of  $5 \text{ °C min}^{-1}$ . The TGA curve of V-MOF-10 indicated a small weight loss (~ 4.3%) from room temperature to 100 °C, followed by a decrease from 100 to 300 °C before framework decomposition.

**Table S3.** Calculated and found values of weight loss during heating of V-MOF-10 under airflow

| Assignment             | Composition                                 | Weight loss (%) |       |
|------------------------|---------------------------------------------|-----------------|-------|
|                        |                                             | Calculated      | Found |
| Residue                | $\text{V}_2\text{O}_5$                      | 19.7            | 17.3  |
| Linker and moiety caps | $\mu\text{-OH}$ and $\text{H}_6\text{TCPP}$ | 78.4            | 80.9  |

## Section S7. N<sub>2</sub> adsorption measurement and surface area prediction

The porosity analysis of activated V-MOF-10 was measured by N<sub>2</sub> adsorption at 77 K.

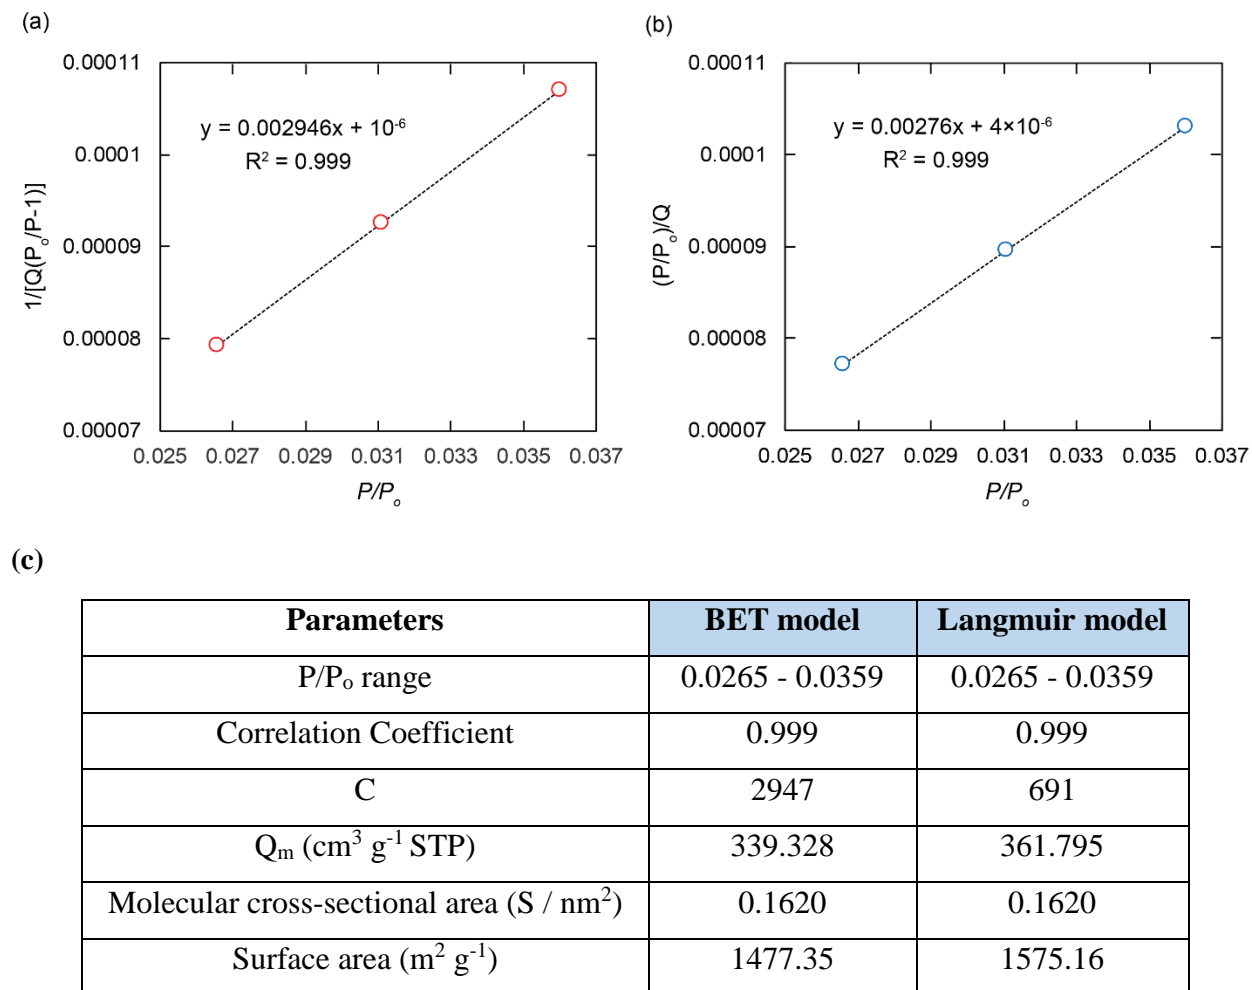

$$S = \frac{Q_m \times N_A \times A}{V}$$

Where S and Q<sub>m</sub> are the BET or Langmuir surface area and quantity adsorbed. N<sub>A</sub> is Avogadro's number, A is the molecular-sectional area and V symbolizes the molar volume of adsorbed gas.

**Figure S9.** Plot of the linear region of the adsorption N<sub>2</sub> isotherm used for the BET equation (a), the Langmuir equation (b), and summary of parameters in the BET and Langmuir analysis (c).

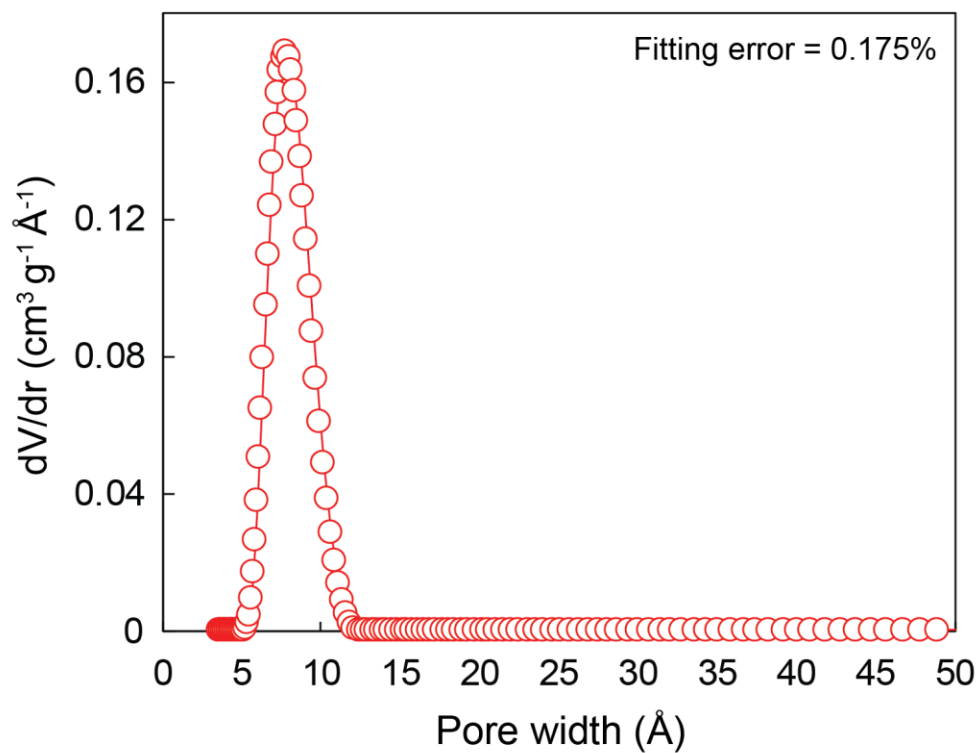

**Figure S10.** Pore size distribution of activated V-MOF-10.  $\text{N}_2$  isotherm was analyzed by quenched solid density functional theory implementing a hybrid kernel at 77 K  $\text{N}_2$  adsorption based on a carbon model containing slit/cylinder/sphere pores

### Theoretical surface area prediction

The theoretical surface area of V-MOF-10 was determined through the Atom Volumes and Surfaces tool of *Materials Studio 7.0* software. The accessible solvent surface area of V-MOF-10 was calculated to be 505 Å<sup>2</sup>. This value was converted into the surface area per gram, leading to a theoretical surface area of 1648 m<sup>2</sup> g<sup>-1</sup>.

**Table S4.** Summary of surface area calculation for V-MOF-10

| V-MOF-10                                                  |       |
|-----------------------------------------------------------|-------|
| Crystal density (g cm <sup>-3</sup> )                     | 0.819 |
| Accessible solvent surface per cell (Å <sup>2</sup> )     | 505   |
| Calculated SA (m <sup>2</sup> g <sup>-1</sup> )           | 1648  |
| Calculated pore volume (cm <sup>3</sup> g <sup>-1</sup> ) | 0.099 |

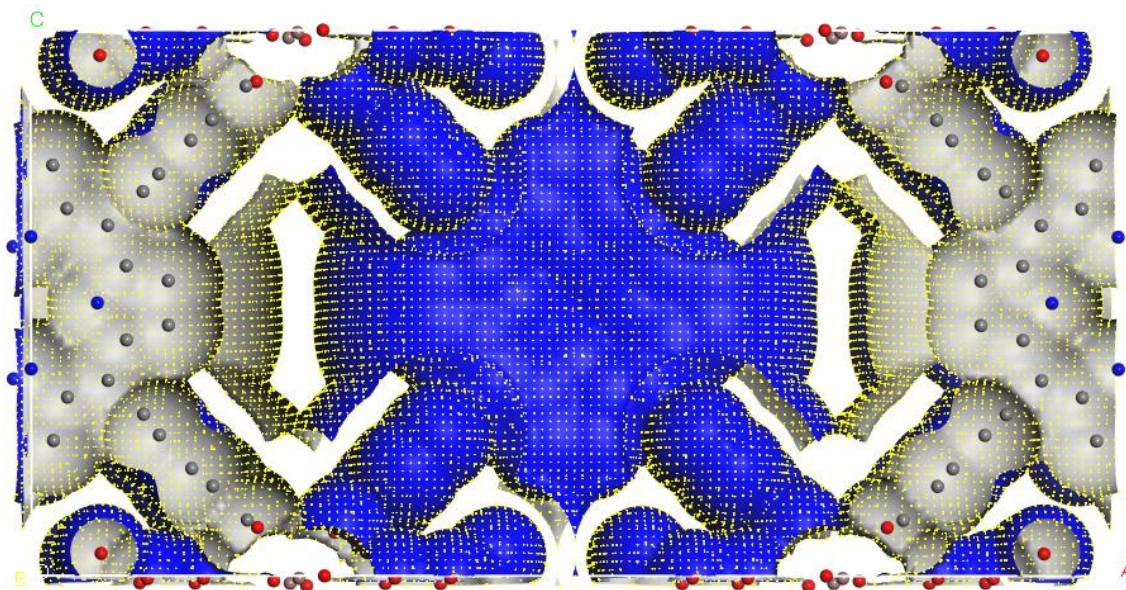

**Figure S11.** Accessible solvent surface and van der Waals surface of V-MOF-10

## Section S8. Scanning Electron Microscopy (SEM) and Energy-Dispersive X-ray Mapping (EDX-mapping) analysis

Scanning electron microscopy (SEM) analysis was conducted on FESEM S-4800 Hitachi by dispersing V-MOF-10 material onto a silicon wafer attached to a flat aluminum sample holder. The material was then measured with accelerating voltage of 10 kV to avoid the damage of the sample structure with the electron beam. Additionally, SEM-EDX-mapping images and analyses were taken with a EDX H-7593 Horiba instrument.

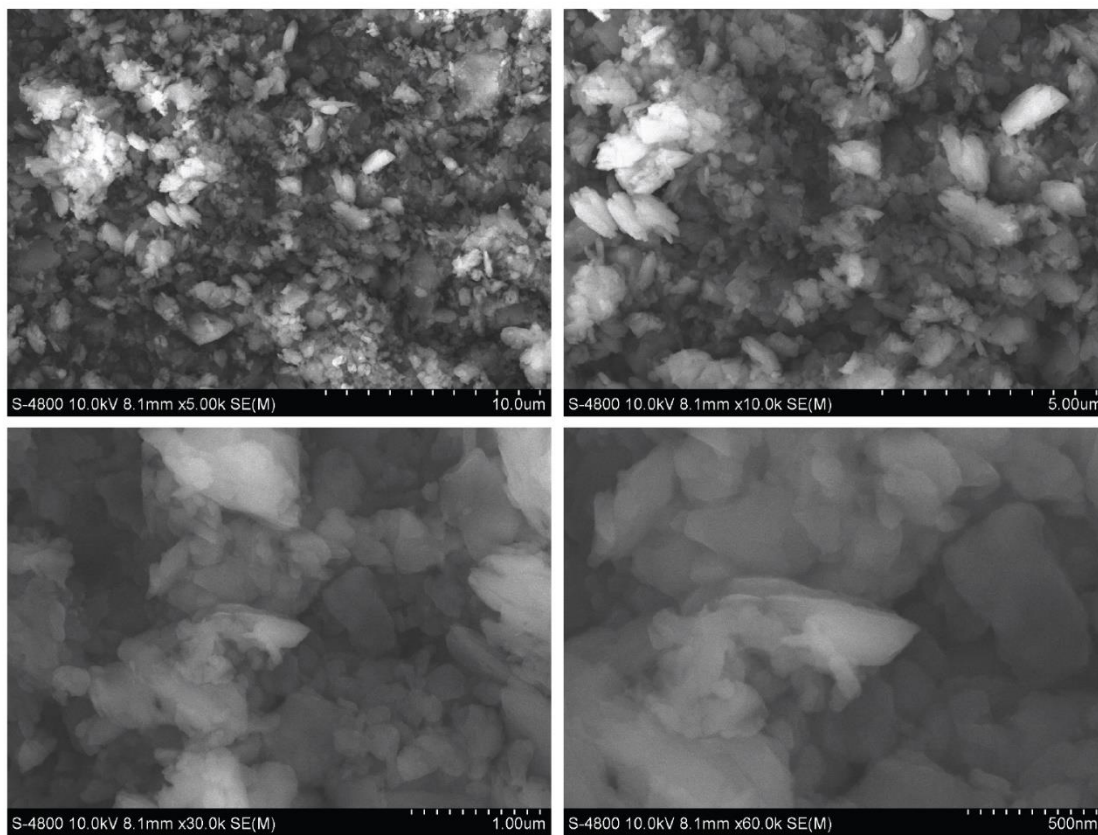

**Figure S12.** SEM images of V-MOF-10 at different scale bars of 10.0 μm, 5.00 μm, 1.00 μm, and 500 nm, respectively

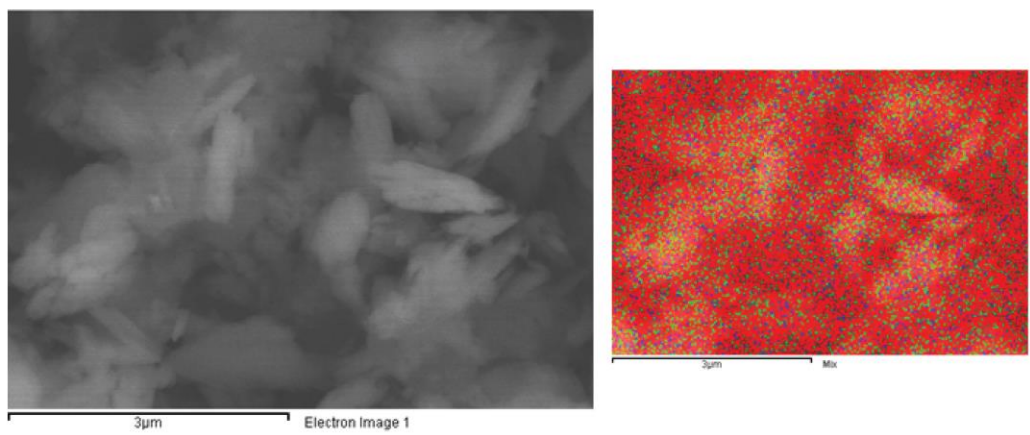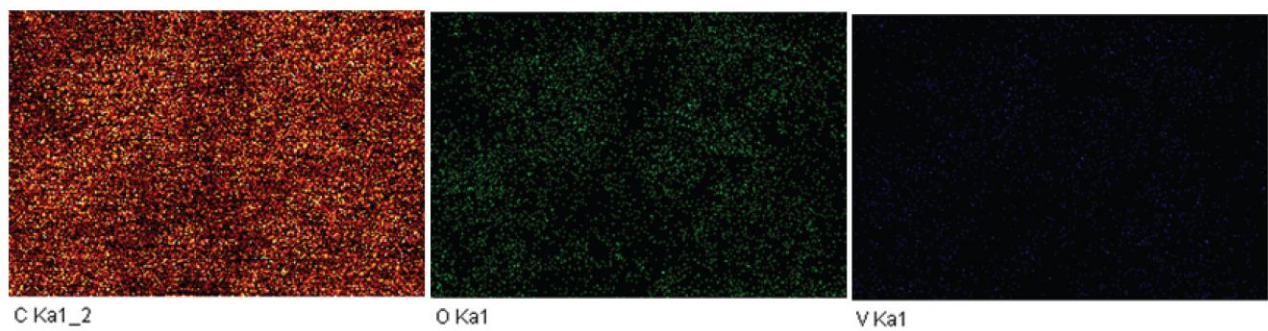

**Figure S13.** Elemental mapping by SEM-EDX of V-MOF-10

## Section S9. Transmission Electron Microscopy (TEM) analysis

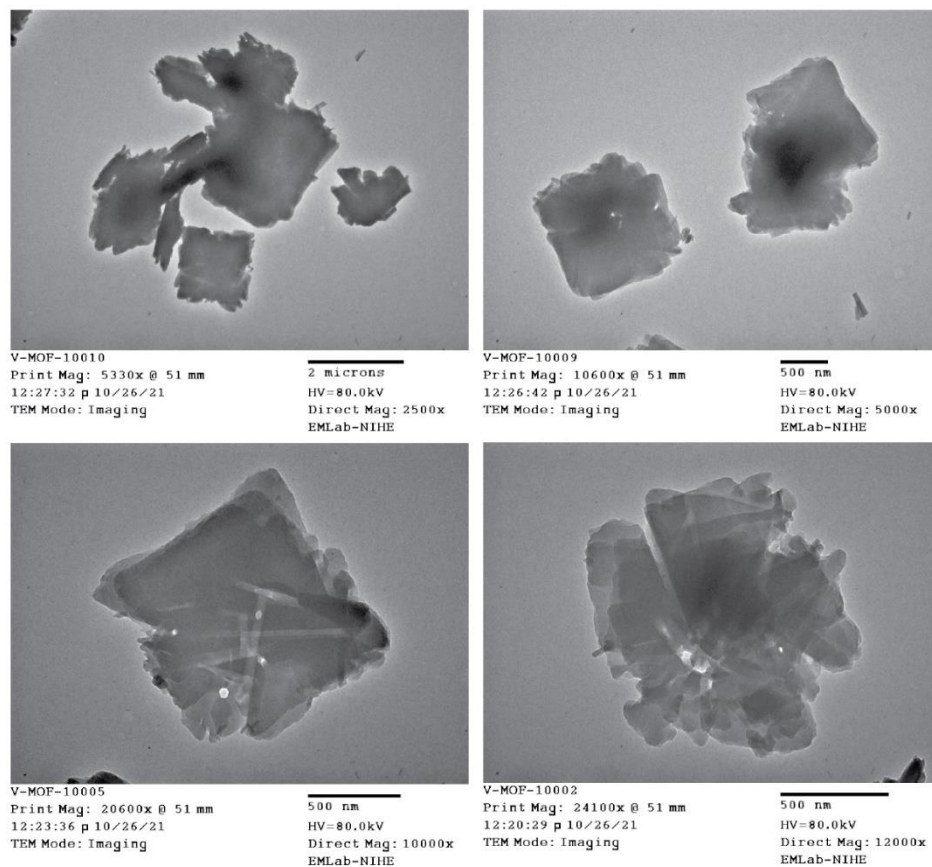

**Figure S14.** TEM images of V-MOF-10 at different magnifications ( $\times 2500$ ,  $\times 5000$ ,  $\times 10000$ ,  $\times 12000$ , respectively)



Section S10. Ultraviolet Visible Spectroscopy (UV-Vis) analysis

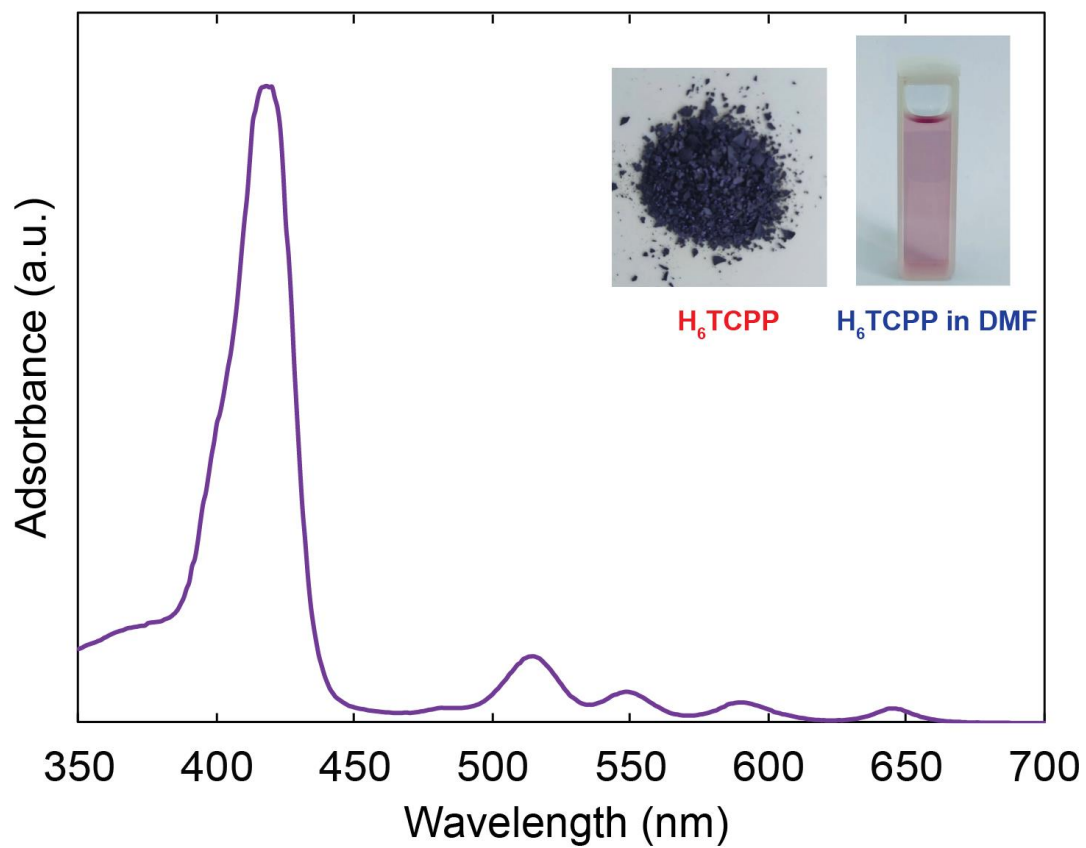

Figure S15. UV-Vis spectrum of pure porphyrinic linker ( $H_6TCPP$ ) in DMF solvent

**Section S11.** Photocatalytic investigations for the degradation of MB and MO

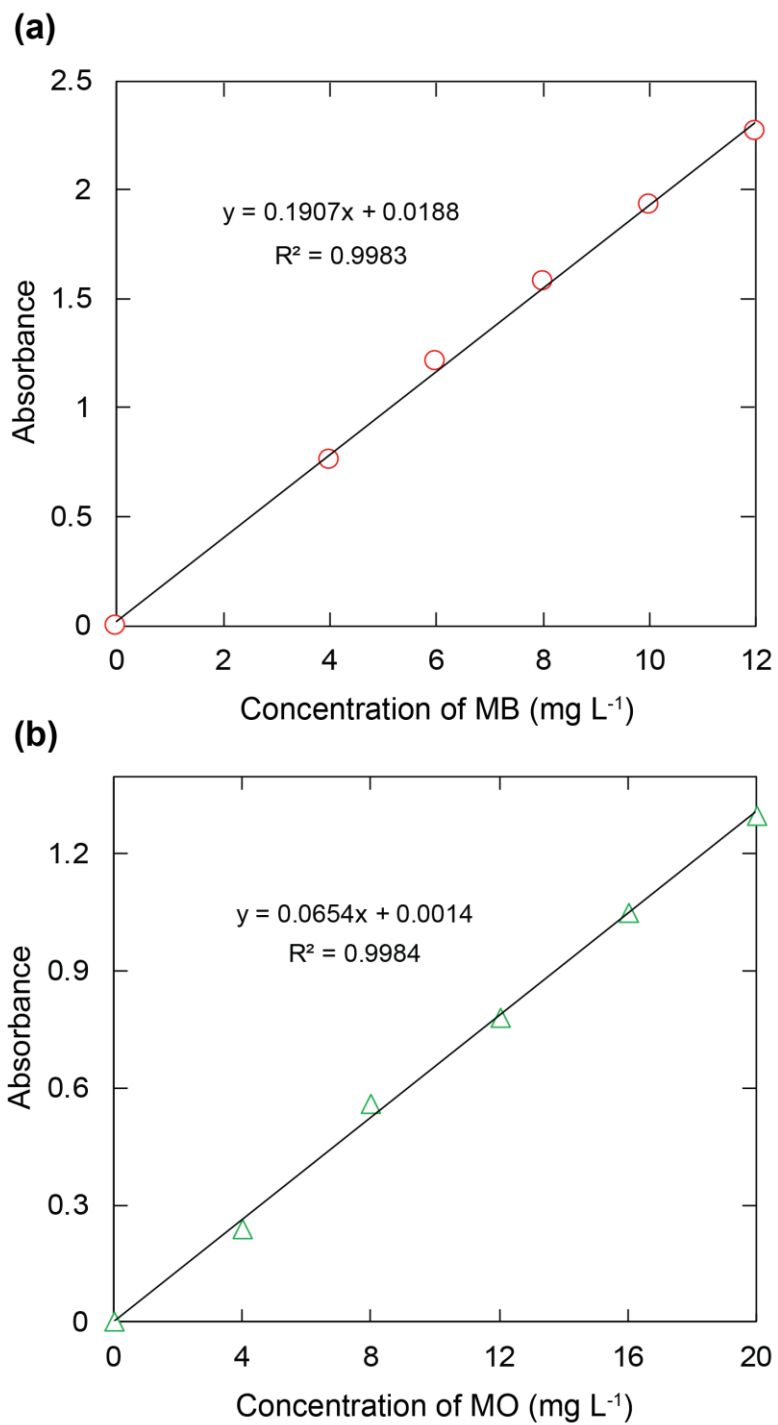

**Figure S16.** The relationship between the absorbed intensity of MB (a) and MO (b) with different concentrations by linear fitting

**Photodegradation kinetics.** The pseudo-first-order kinetics are employed to determine the photodegradation rate of MB and MO, which is exhibited by the eqn:

$$\ln\left(\frac{C_t}{C_o}\right) = -k_1t$$

Where  $C_t$  and  $C_o$  are each organic dye concentration at  $t$  and initial time,  $k_1$  are the rate constant of pseudo-first-order.

**Section S12.** Stability of V-MOF-10 after photocatalytic recycles

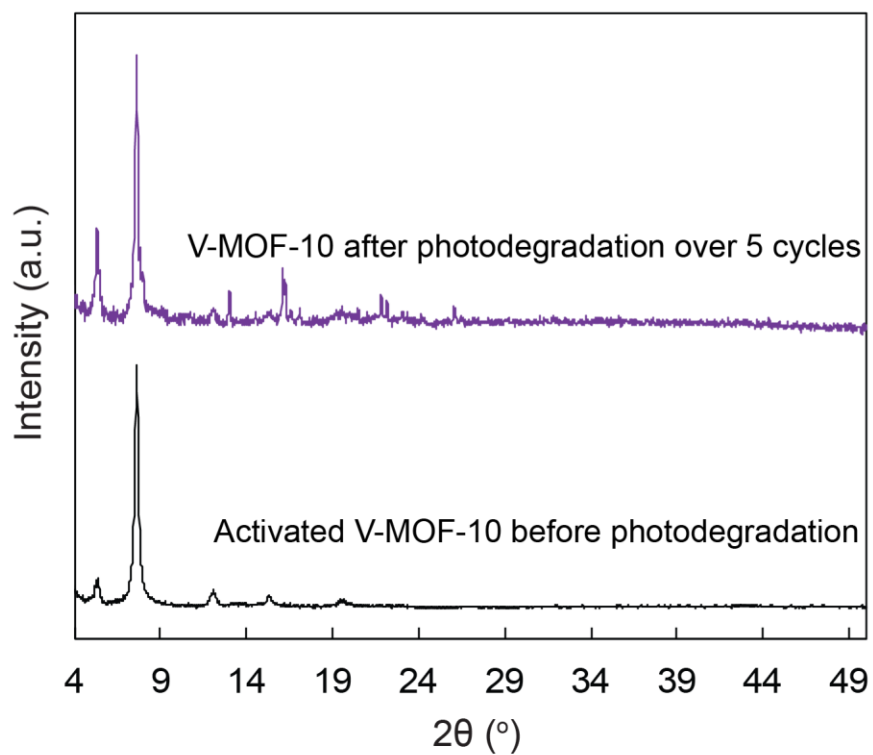

**Figure S17.** PXRD pattern of V-MOF-10 after photocatalytic reaction over five cycles
